# Supplementary material
Source: MDPI journal article supplement (https://www.mdpi.com/2075-4655/8/1/5)
Supplement: s1 [file s1]

# Angio-long noncoding RNAs-related gene variants in ovarian cancer

| COLOR | STATE NO. | MNEMONIC | DESCRIPTION                |
|-------|-----------|----------|----------------------------|
|       | 1         | TssA     | Active TSS                 |
|       | 2         | TssAFlnk | Flanking Active TSS        |
|       | 3         | TxFlnk   | Transcr. at gene 5' and 3' |
|       | 4         | Tx       | Strong transcription       |
|       | 5         | TxWk     | Weak transcription         |
|       | 6         | EnhG     | Genic enhancers            |
|       | 7         | Enh      | Enhancers                  |
|       | 8         | ZNF/Rpts | ZNF genes & repeats        |
|       | 9         | Het      | Heterochromatin            |
|       | 10        | TssBiv   | Bivalent/Poised TSS        |
|       | 11        | BivFlnk  | Flanking Bivalent TSS/Enh  |
|       | 12        | EnhBiv   | Bivalent Enhancer          |
|       | 13        | ReprPC   | Repressed PolyComb         |
|       | 14        | ReprPCWk | Weak Repressed PolyComb    |
|       | 15        | Quies    | Quiescent/Low              |

**Figure S1.** Color scheme of 15 chromatin states in ChromHMM core model applied in CIRCOS plot. Data source (<https://omic.tech/3dsnpv2/>) (last accessed 30 March 2023) [32].

| COLOR | CELL TYPE | DESCRIPTION                              | TISSUE       |
|-------|-----------|------------------------------------------|--------------|
|       | GM12878   | Lymphoblastoid Cells                     | Blood        |
|       | K562      | K562 leukemia Cells                      | Blood        |
|       | H1-hESC   | Embryonic stem cells                     | ESC          |
|       | IMR90     | Fetal lung fibroblasts                   | Lung         |
|       | HeLa-S3   | Cervical carcinoma cells                 | Cervix       |
|       | HUVEC     | Umbilical vein endothelial cells         | Blood vessel |
|       | NHEK      | Epidermal keratinocytes                  | Skin         |
|       | HMEC      | Mammary epithelial cells                 | Breast       |
|       | KBM-7     | Chronic myelogenous leukemia (CML) cells | Blood        |
|       | LNCaP     | Prostate adenocarcinoma                  | Prostate     |
|       | PC3       | Prostate cancer cells                    | Prostate     |
|       | PrEC      | Prostate epithelial cell line            | Prostate     |

**Figure S2.** Color scheme of twelve cell types for the chromatin loop track in CIRCOS plot. Data source (<https://omic.tech/3dsnpv2/>) (last accessed 30 March 2023) [32].

**Table S1.** Tissue-specific predictions of regulatory probabilities of the study variants

| SNP ID    | SNP Position   | Gene Symbol | Gene Position  | Distance | Tissue | Score   |
|-----------|----------------|-------------|----------------|----------|--------|---------|
| rs3200401 | chr11:65271831 | MALAT1      | chr11:65265232 | 6599     | Ovary  | 0.21942 |
| rs1061540 | chr22:27062037 | MIAT        | chr22:27042391 | 19646    | Ovary  | 0.64169 |

Data source <https://regvar.omic.tech/> (last accessed 30 March 2023) [33].
